# Supplementary material
Source: publisher figshare collection journal article supplement (https://acs.figshare.com/ndownloader/files/3817423)
Supplement: Supplementary file 1 [file 3817423]

Supporting Information for

**Structural Evolution of Ag-Pd Bimetallic Nanoparticles through  
Controlled Galvanic Replacement: Effects of Mild Reducing Agents**

Hao Jing and Hui Wang\*

*Department of Chemistry and Biochemistry, University of South Carolina, Columbia,  
South Carolina 29208, United States*

\* To whom correspondence should be addressed.

Email: [wang344@mailbox.sc.edu](mailto:wang344@mailbox.sc.edu); Phone: 803-777-2203; Fax: 803-777-9521.

## S1. Additional Experimental Details

**Synthesis of Ag Nanocubes.** To fabricate Ag nanocubes ( $\sim 40$  nm edge-length), 40 mL of ethylene glycol (EG) was added into a 100 mL round bottom flask and preheated under magnetic stir in an oil bath set to  $150^\circ\text{C}$  for about 40 min. Then 500  $\mu\text{L}$  of 3 mM NaHS solution, 3 mL of 3 mM HCl, and 10 mL of PVP (100 mg/mL) were added sequentially. After stirring the mixture for 2 min, 3 mL of 282 mM  $\text{CF}_3\text{COOAg}$  solution was added. During the entire process, the flask was capped with a glass stopper except during the addition of reagents. After 22 min, the reaction was quenched in an ice-water bath when the suspension had reached a brown color with a characteristic plasmon resonance peak at  $\sim 420$  nm in the extinction spectrum. The Ag nanocubes were centrifuged (8000 rpm, 8 min), washed with acetone and then water, and finally redispersed in 6 mL of EG. The particle concentration of the 40 nm nanocubes was  $2.5 \times 10^{12}$  particles  $\text{mL}^{-1}$ . Ag nanocubes with average edge-length of  $\sim 100$  nm were prepared through a seed-mediated growth process. Typically, 10 mL of EG was added into a 50 mL round bottom flask and heated in an oil bath at  $150^\circ\text{C}$  under magnetic stir. After 10 min, 3 mL of PVP (250 mg/mL in EG) was added. After another 10 min, 200  $\mu\text{L}$  of colloidal suspension of  $\sim 40$  nm Ag nanocubes was introduced, followed by the addition of 2 mL of 282 mM  $\text{AgNO}_3$ . After 20 min, the reaction was quenched by immersing the reaction mixture in an ice-water bath. The product was centrifuged (8000 rpm, 8 min), washed with acetone and then water, and finally redispersed in 10 mL of water for future use. The particle concentration of the  $\sim 100$  nm nanocubes was  $5 \times 10^{10}$  particles  $\text{mL}^{-1}$ .

**Synthesis of Quasi-Spherical Ag Nanoparticles.** Single-crystalline Ag quasi-spherical nanoparticles were fabricated through etching of Ag nanocubes by  $\text{Fe}(\text{NO}_3)_3$ . 200  $\mu\text{L}$  of aqueous solution of Ag nanocubes (100 nm edge-length) was added to 2 mL of ultrapure water in a small vial under magnetic stir. The etching was initiated by the addition of 20  $\mu\text{L}$  of 50 mM freshly-prepared  $\text{Fe}(\text{NO}_3)_3$  at room temperature and the sample was centrifuged (6000 rpm, 5min) after 20 min and was redispersed in 1 mL water to obtain Ag nanocubes with truncated corners. To obtain Ag quasi-spherical nanoparticles, the protocol was similar to that used for the truncated nanocubes except for the use of 5  $\mu\text{L}$  of 500 mM freshly-prepared  $\text{Fe}(\text{NO}_3)_3$  solution as the etchant. The vial was capped at room temperature for 2 hours till the completion of etching. The resulting Ag quasi-spherical nanoparticles were centrifuged (6000 rpm, 5min), washed with water twice, and finally redispersed in 1 mL water.

**Synthesis of Quasi-Spherical Au Nanoparticles.** Quasi-spherical Au nanoparticles with average diameter of  $\sim 94$  nm were synthesized by reducing chloroauric acid with formaldehyde at room temperature. Briefly, 50 mg of  $\text{K}_2\text{CO}_3$  was dissolved in 200 mL water, followed by the addition of 3 mL of 25 mM  $\text{HAuCl}_4$ . The mixture was aged in the dark for at least 12 h. Then 0.3 mL of formaldehyde solution (37 wt%) was added into the mixture under vigorous magnetic stir at 300 rpm. A brick-red colloidal suspension began to form after  $\sim 15$  min. The colloidal suspension was kept being stirred for 30 min. Then Au nanoparticles were centrifuged at 2000 rpm, washed with PVP aqueous solution (20 g/L) and ethanol in sequence, and finally redispersed in 10 mL of water. The final concentration of aqueous Au colloidal suspension was  $\sim 6 \times 10^{10}$  particles  $\text{mL}^{-1}$ .

## S2. Additional Figures

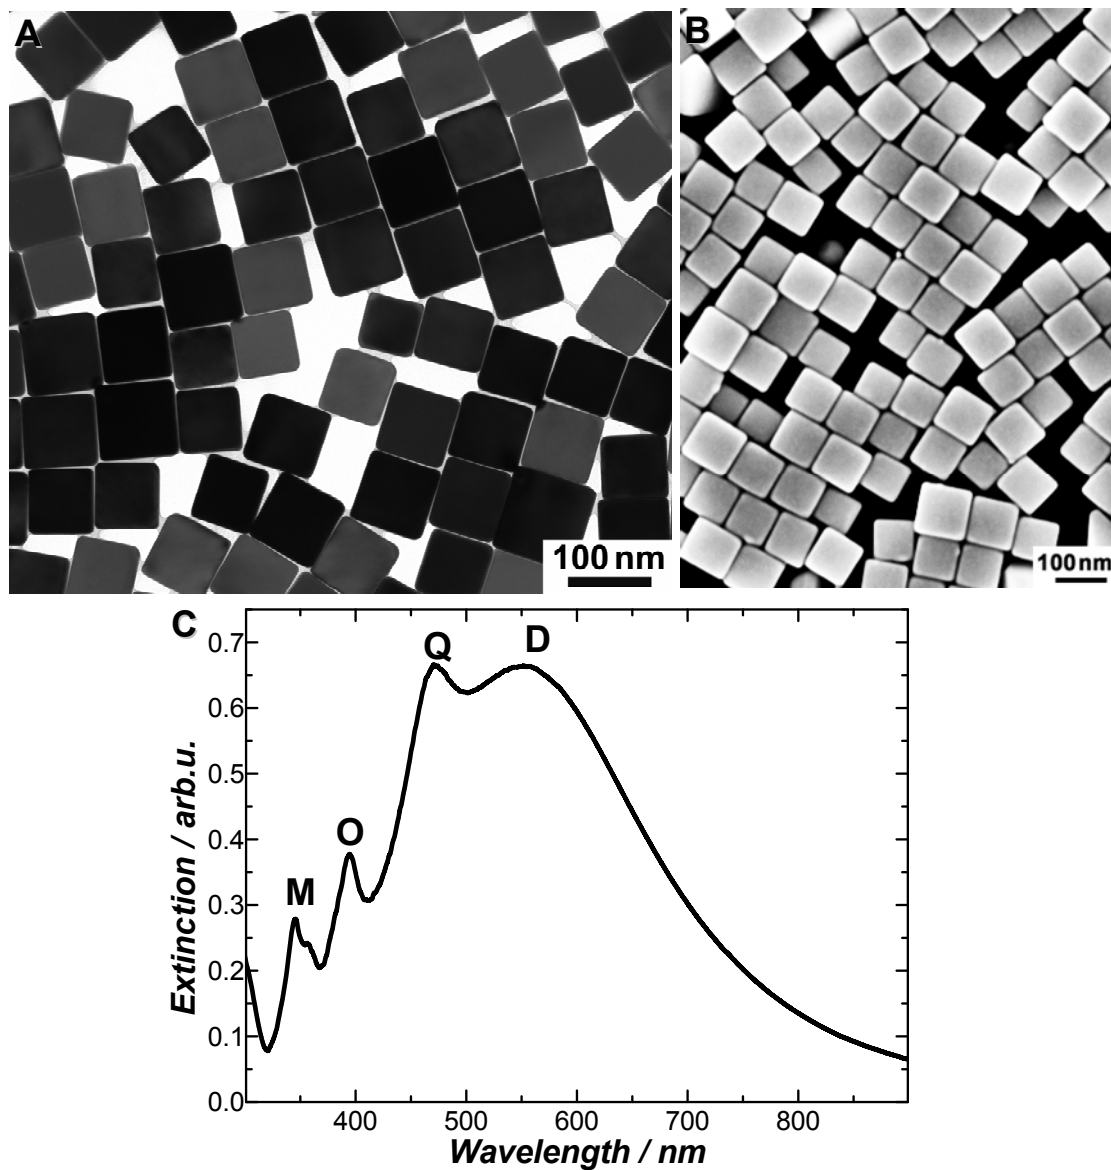

**Figure S1.** (A) TEM and (B) SEM images of Ag nanocubes. (C) Extinction spectrum of colloidal Ag nanocubes dispersed in H<sub>2</sub>O. The four extinction peaks were assigned to the dipole, quadrupole, octupole, and higher-order multipole plasmon resonances, which were labeled as D, Q, O, and M respectively.

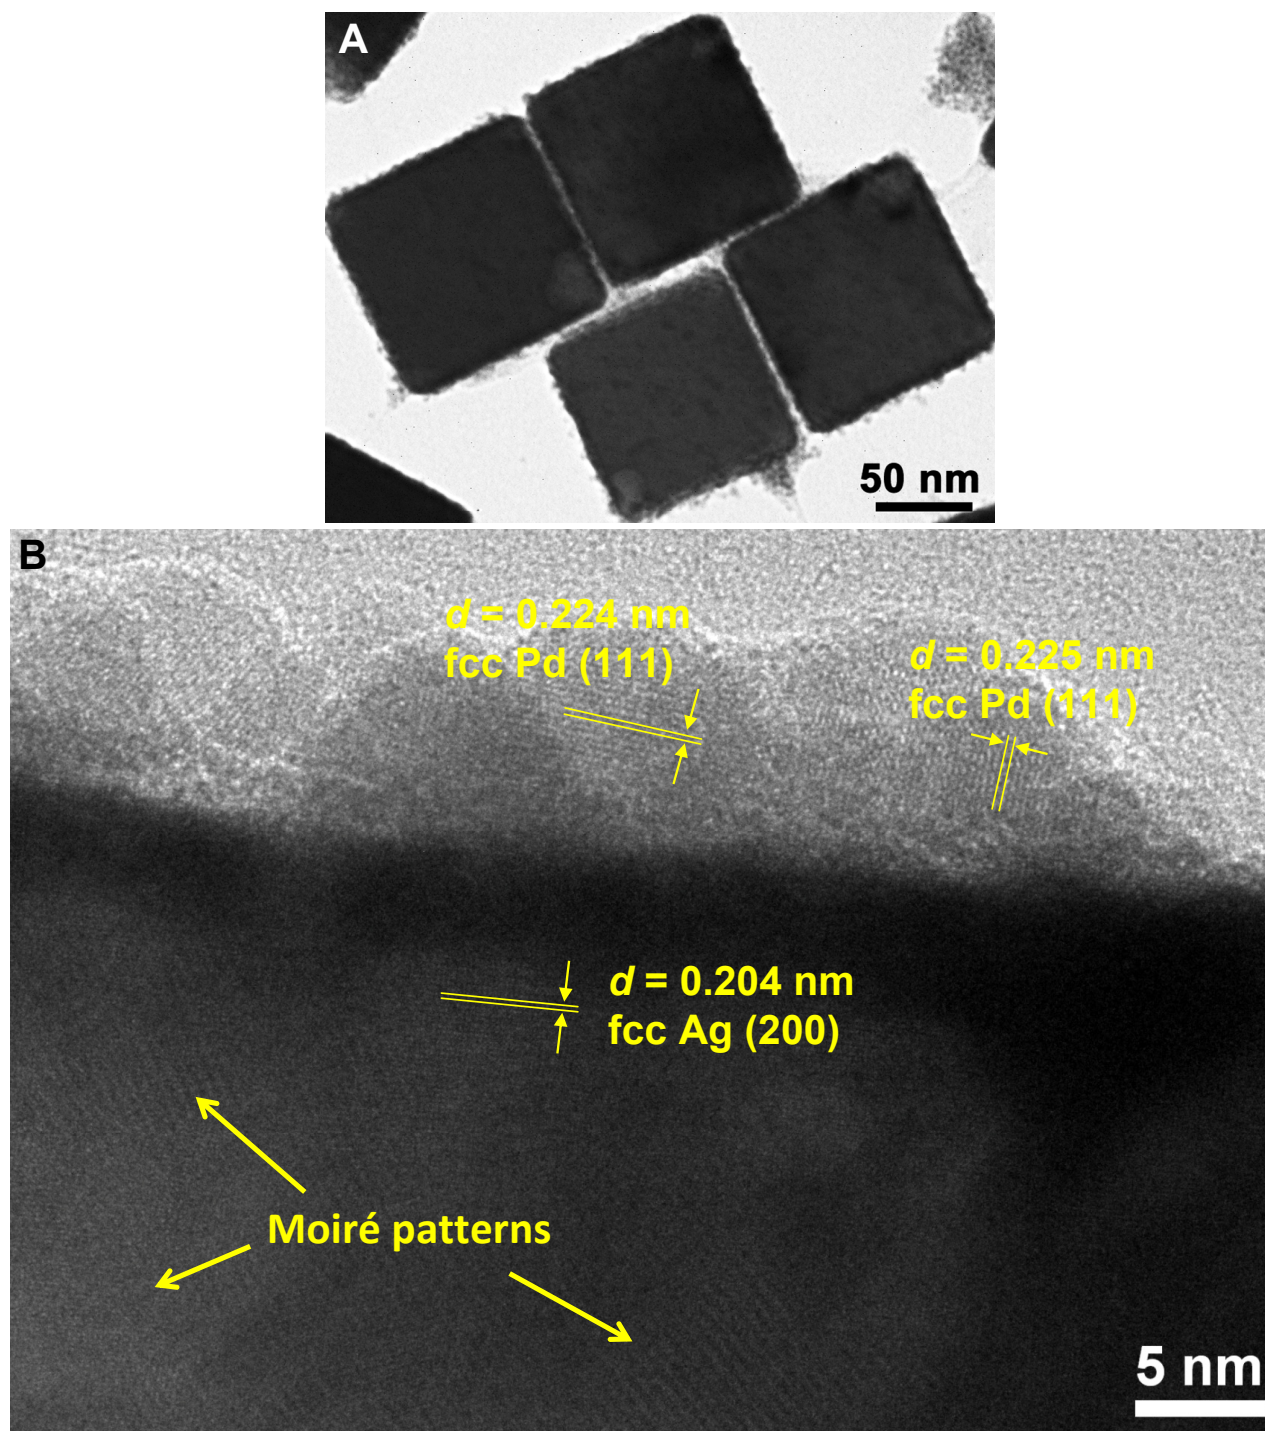

**Figure S2.** (A) TEM image showing the initiation of pitting and deposition of Pd on the outer surfaces of Ag nanocubes upon galvanic replacement of Ag nanocubes with 20  $\mu\text{L}$  of 1 mM  $\text{H}_2\text{PdCl}_4$  in the absence of reducing agents. (B) High-resolution TEM image showing the surface structures of one particle.



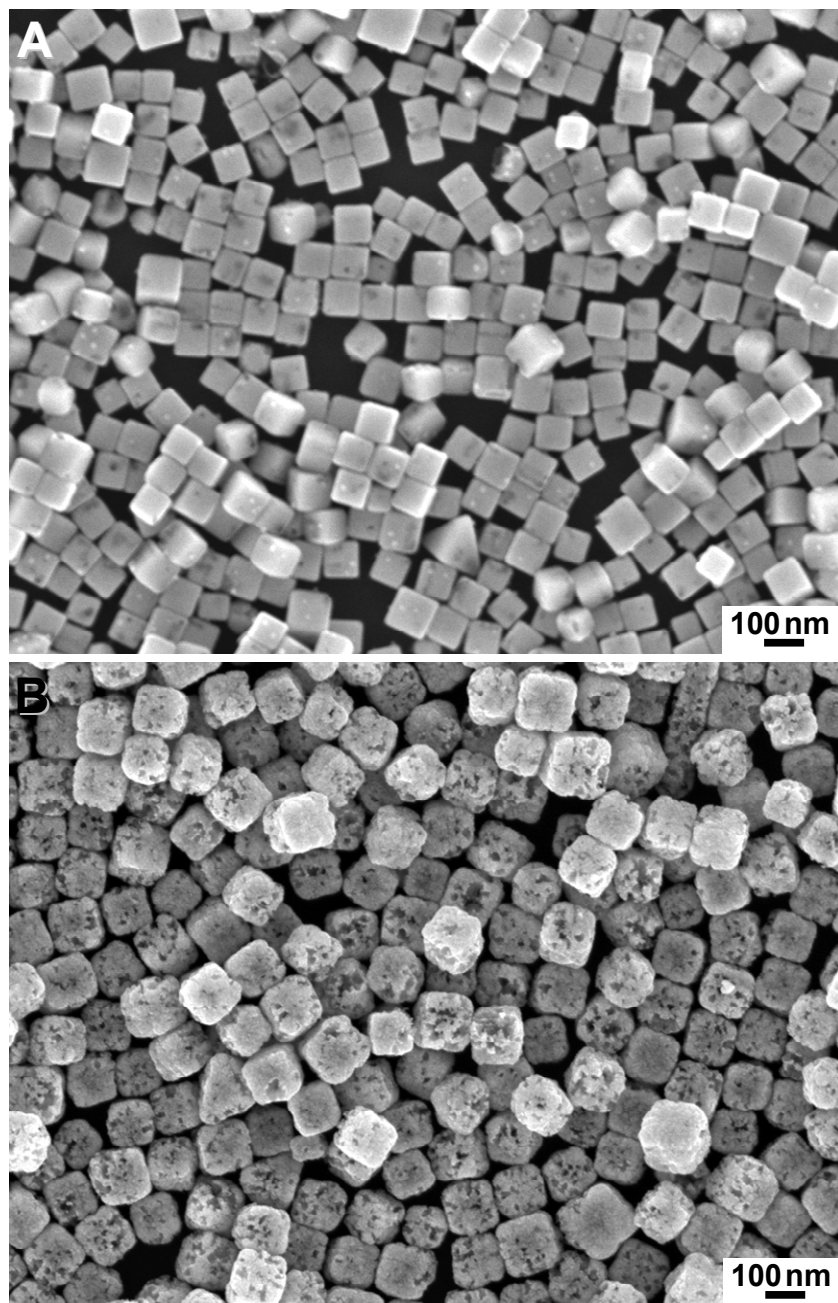

**Figure S3.** SEM images of Ag-Pd bimetallic nanoparticles obtained through galvanic replacement of Ag nanocubes with (A) 60  $\mu\text{L}$  and (B) 200  $\mu\text{L}$  of 1 mM  $\text{H}_2\text{PdCl}_4$  in the absence of reducing agents.

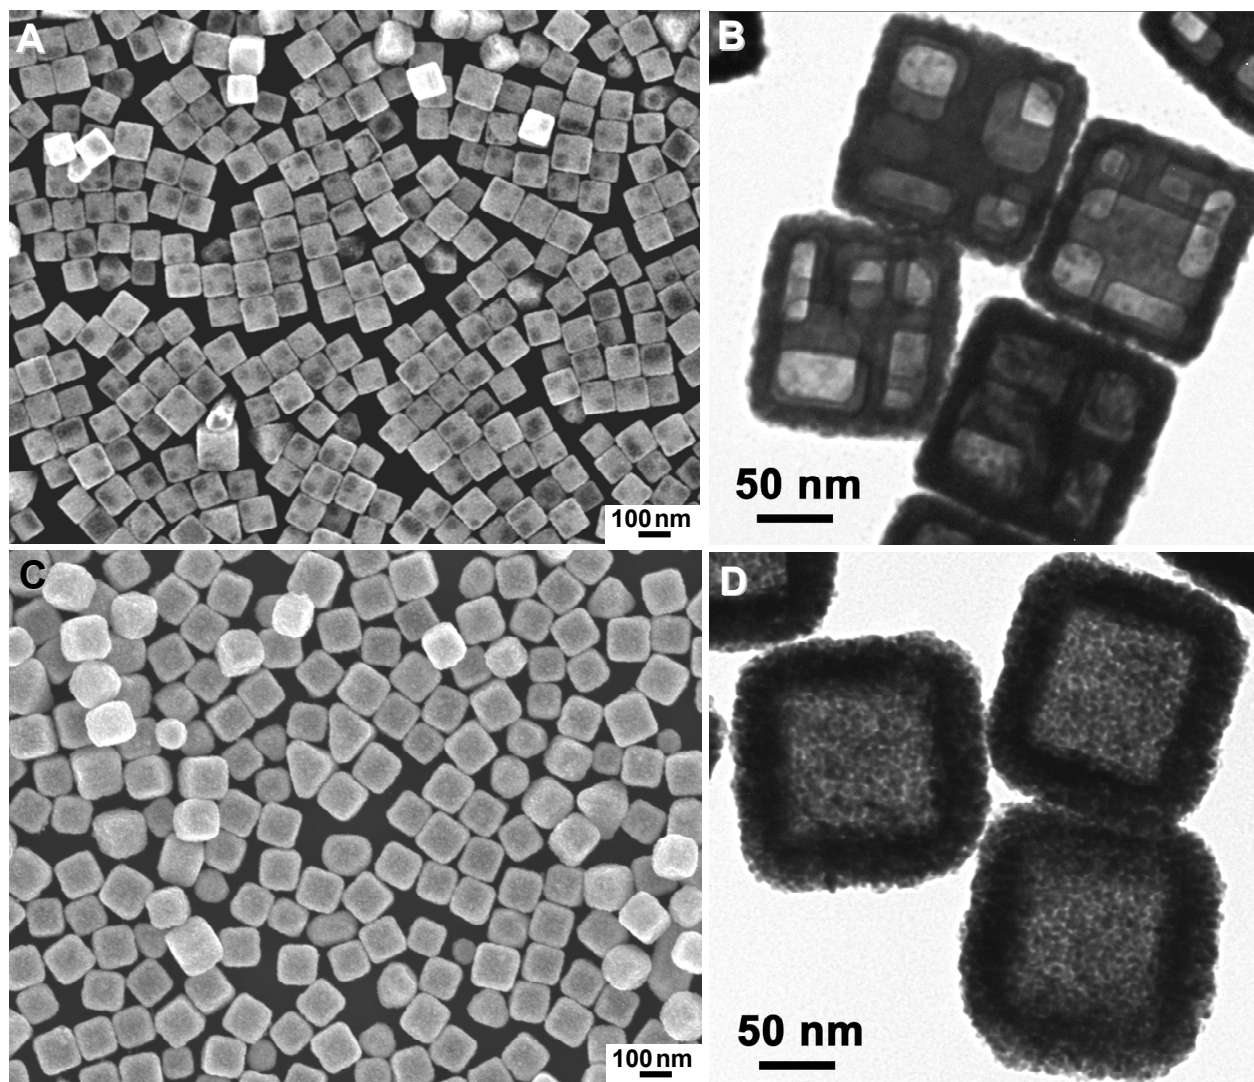

**Figure S4.** (A) SEM and (B) TEM images of Ag-Pd multi-chambered nanoboxes obtained through galvanic replacement of Ag nanocubes with 60  $\mu\text{L}$  of 1 mM  $\text{H}_2\text{PdCl}_4$  in the presence of AA. (C) SEM and (D) TEM images of Ag-Pd hollow nanoparticles with porous walls obtained through galvanic replacement of Ag nanocubes with 200  $\mu\text{L}$  of 1 mM  $\text{H}_2\text{PdCl}_4$  in the presence of AA.

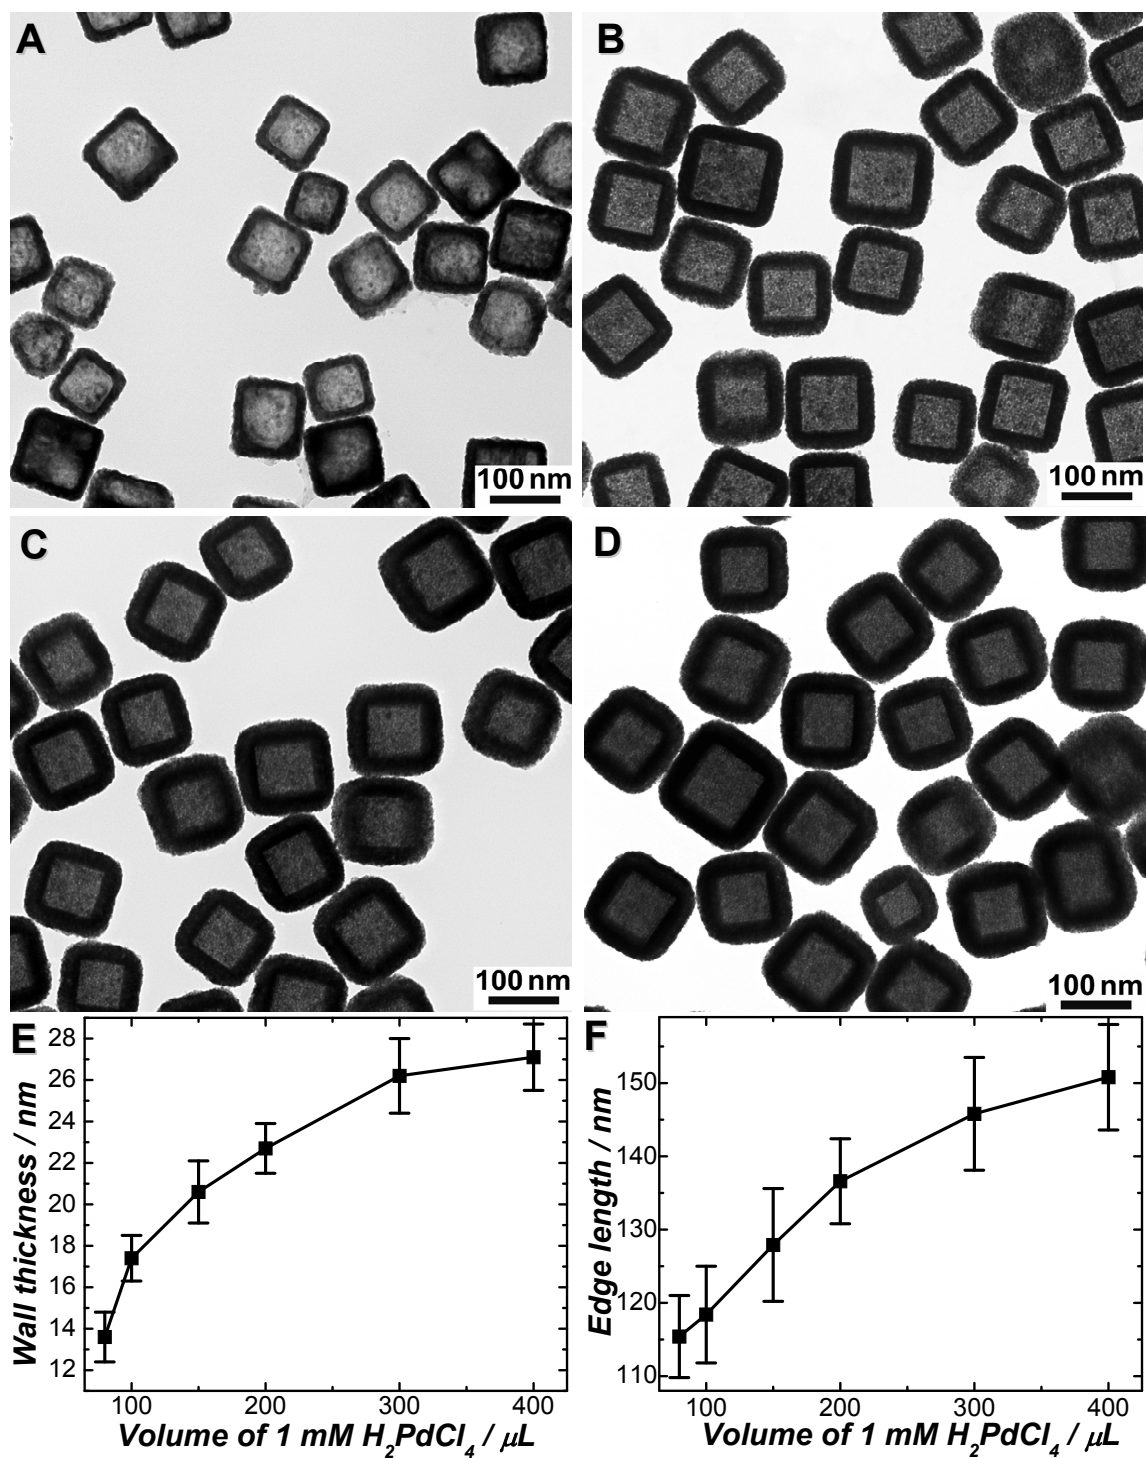

**Figure S5.** TEM images of Ag-Pd bimetallic hollow nanostructures obtained through galvanic replacement of Ag nanocubes with (A) 80  $\mu L$ , (B) 150  $\mu L$ , (C) 300  $\mu L$ , and (D) 400  $\mu L$  of 1 mM  $H_2PdCl_4$  solution in the presence of AA. (E) Average wall thickness and (F) edge length of Ag-Pd bimetallic hollow nanoparticles as a function of the volume of 1 mM  $H_2PdCl_4$ . The error bars represent the standard deviations obtained from more than 200 nanoparticles in the TEM image of each sample.



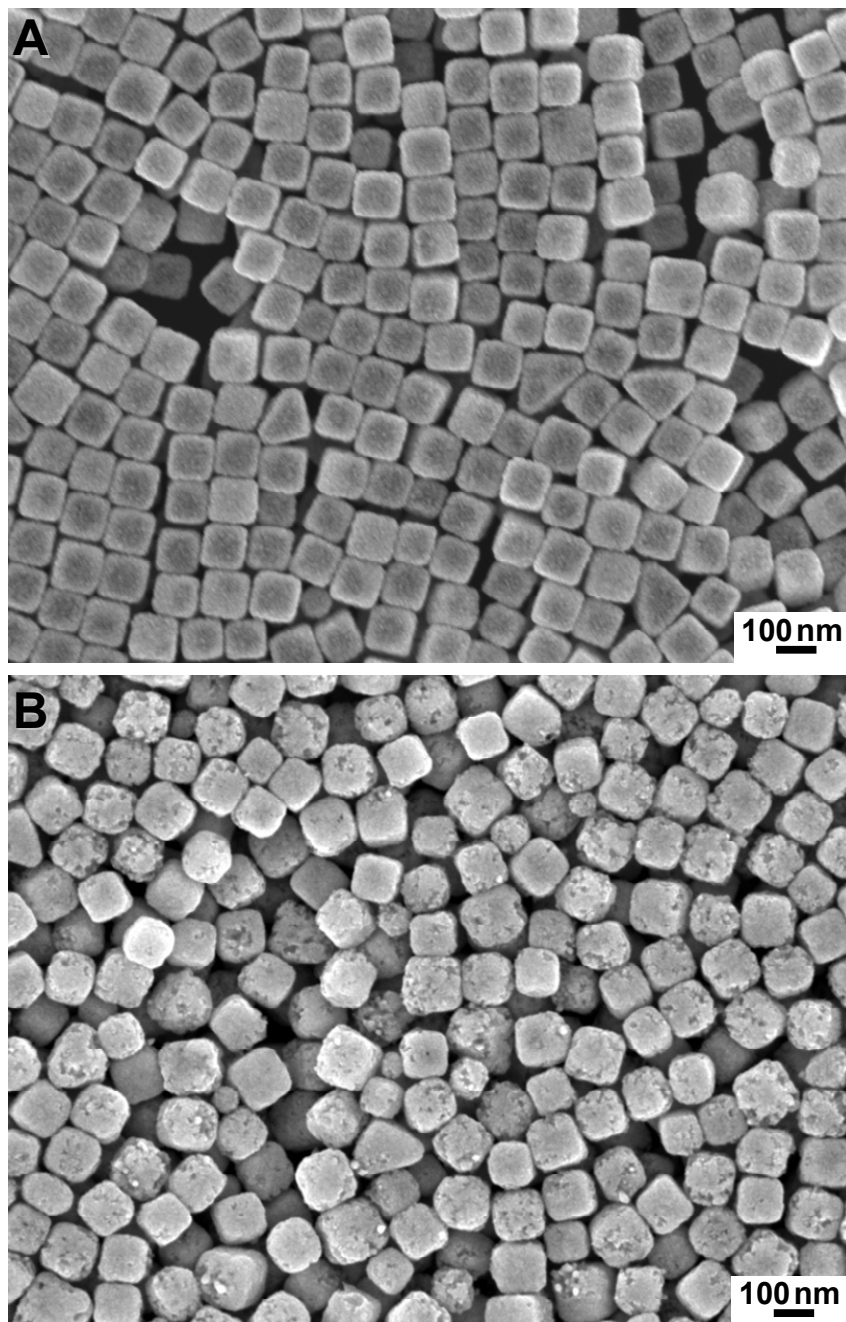

**Figure S6.** SEM images of Ag-Pd bimetallic nanoparticles obtained through galvanic replacement of Ag nanocubes with (A) 60  $\mu\text{L}$  and (B) 200  $\mu\text{L}$  of 1 mM  $\text{H}_2\text{PdCl}_4$  in the presence of HCHO.

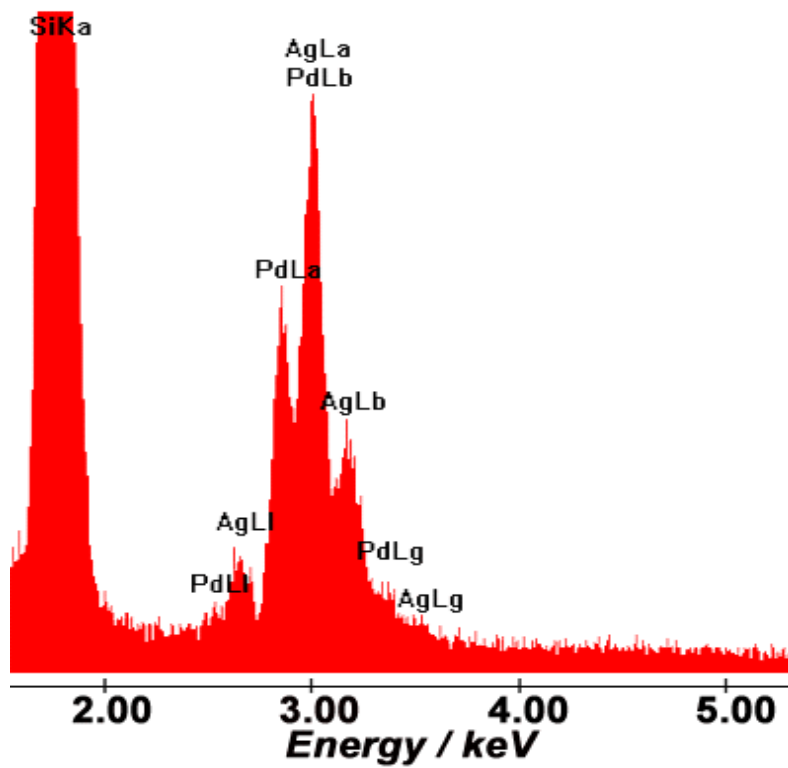

**Figure S7.** EDS spectrum of Ag-Pd bimetallic nanoparticles obtained through galvanic replacement of Ag nanocubes with 400  $\mu\text{L}$  of 1 mM  $\text{H}_2\text{PdCl}_4$  in the presence of AA.

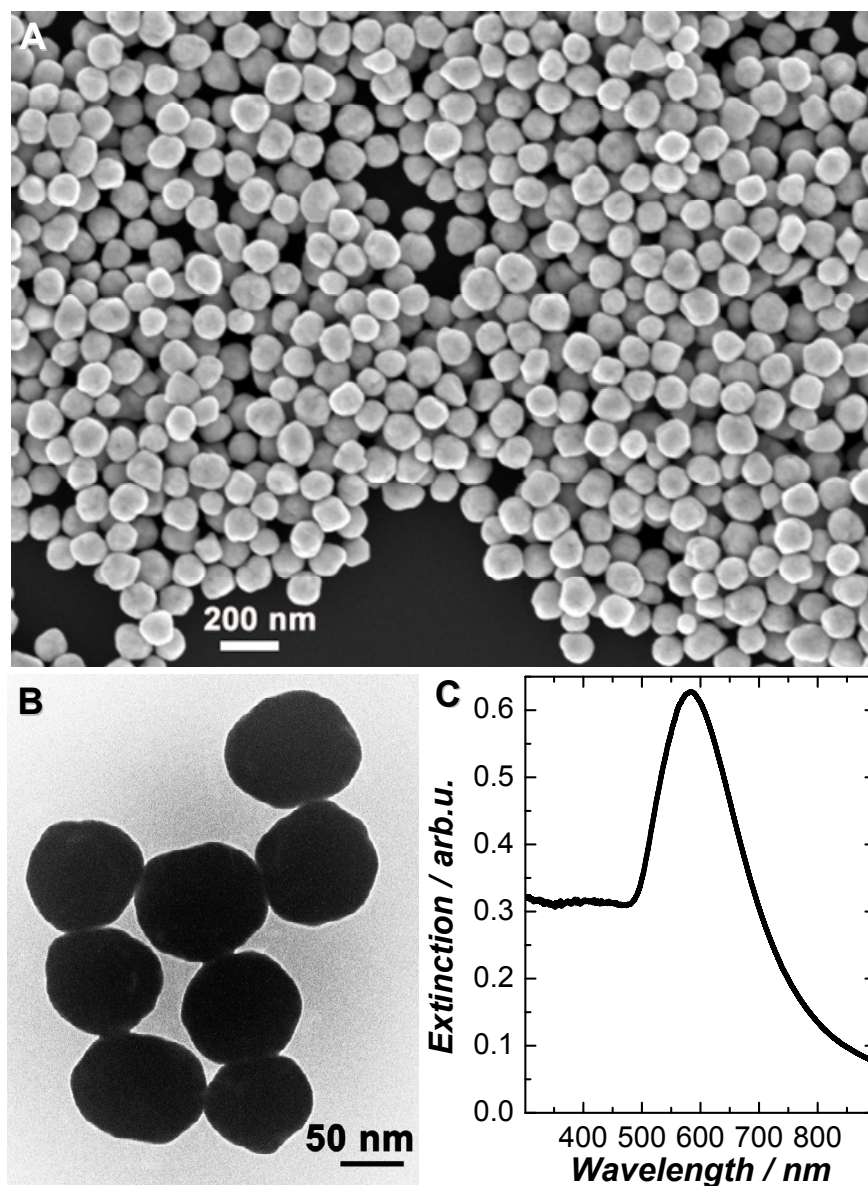

**Figure S8.** (A) SEM image, (B) TEM image, and (C) extinction spectrum of Au quasi-spherical nanoparticles.



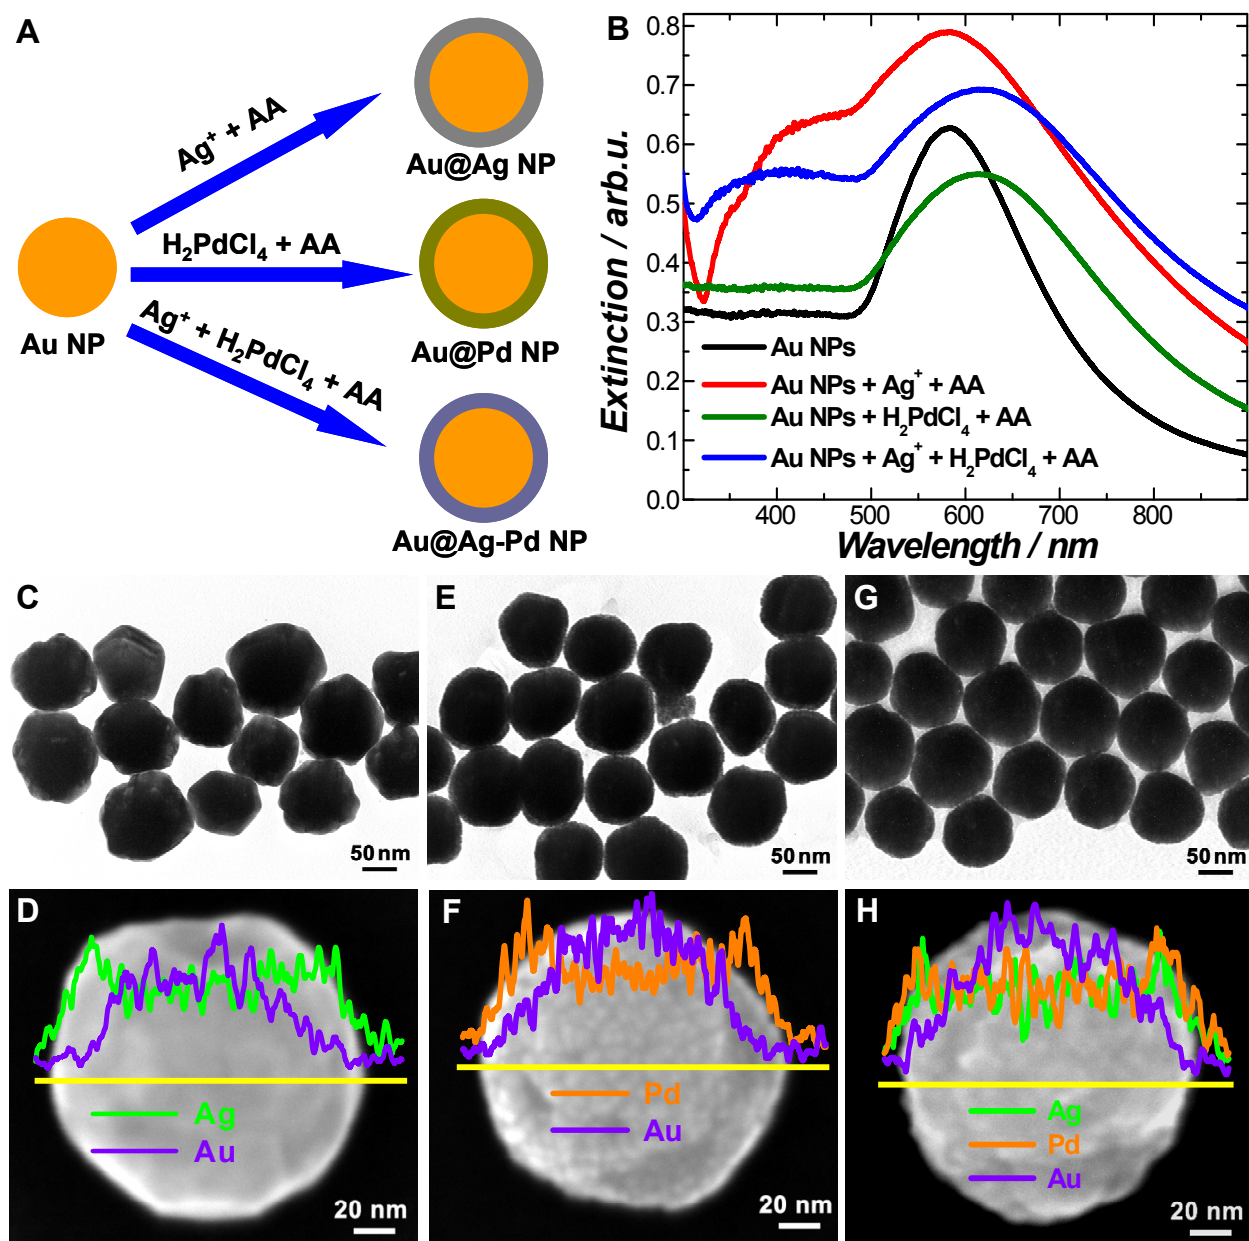

**Figure S9.** (A) Schematic illustration of Au nanoparticle-seeded electroless plating of Ag and Pd in the presence of AA. (B) Extinction spectra of Au nanoparticles and Au@Ag, Au@Pd, and Au@Ag-Pd alloy core-shell nanoparticles. TEM images of (C) Au@Ag, (E) Au@Pd, and (G) Au@Ag-Pd alloy core-shell nanoparticles. SEM images and EDS line-scan elemental analysis of individual (D) Au@Ag, (F) Au@Pd, and (H) Au@Ag-Pd core-shell nanoparticles.

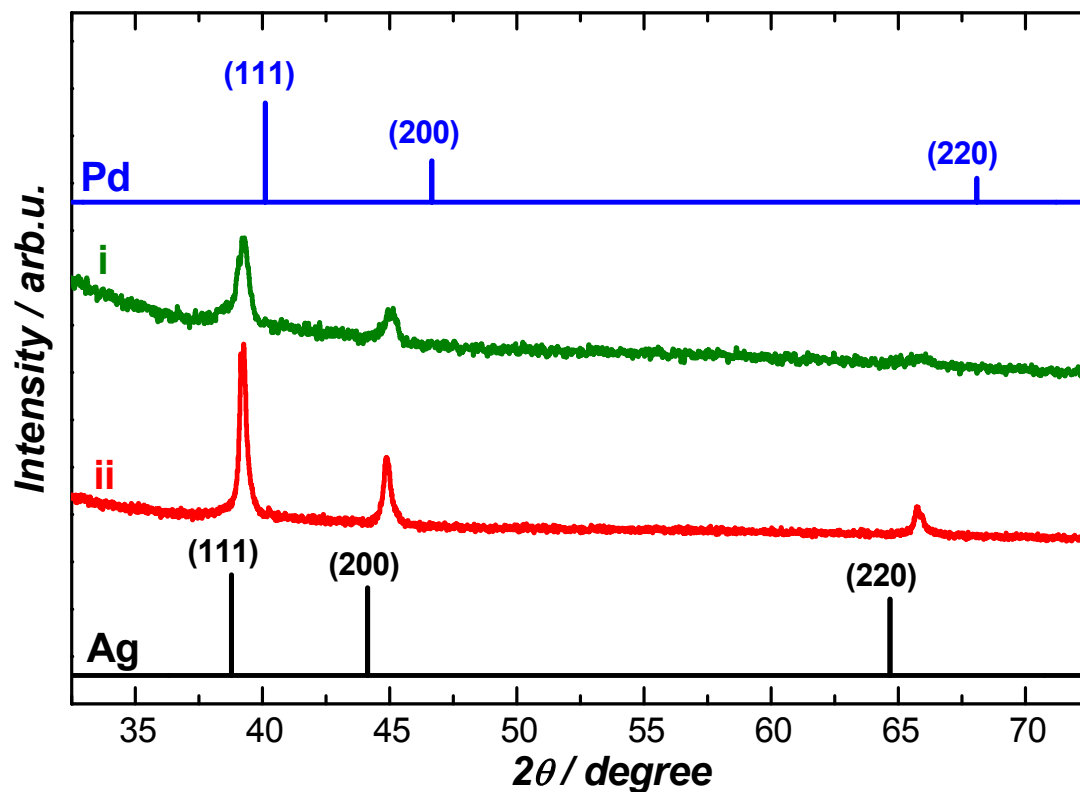

**Figure S10.** PXRD patterns of Ag-Pd bimetallic hollow nanoparticles obtained through galvanic replacement of Ag nanocubes with (i) 200  $\mu\text{L}$  of 1 mM  $\text{H}_2\text{PdCl}_4$  in the presence of AA and (ii) 200  $\mu\text{L}$  of 1 mM  $\text{H}_2\text{PdCl}_4$  in the presence of HCHO. The standard PXRD patterns for bulk face-centered cubic Ag (PDF number 3-391) and Pd (PDF number 5-681) are also included for comparison.

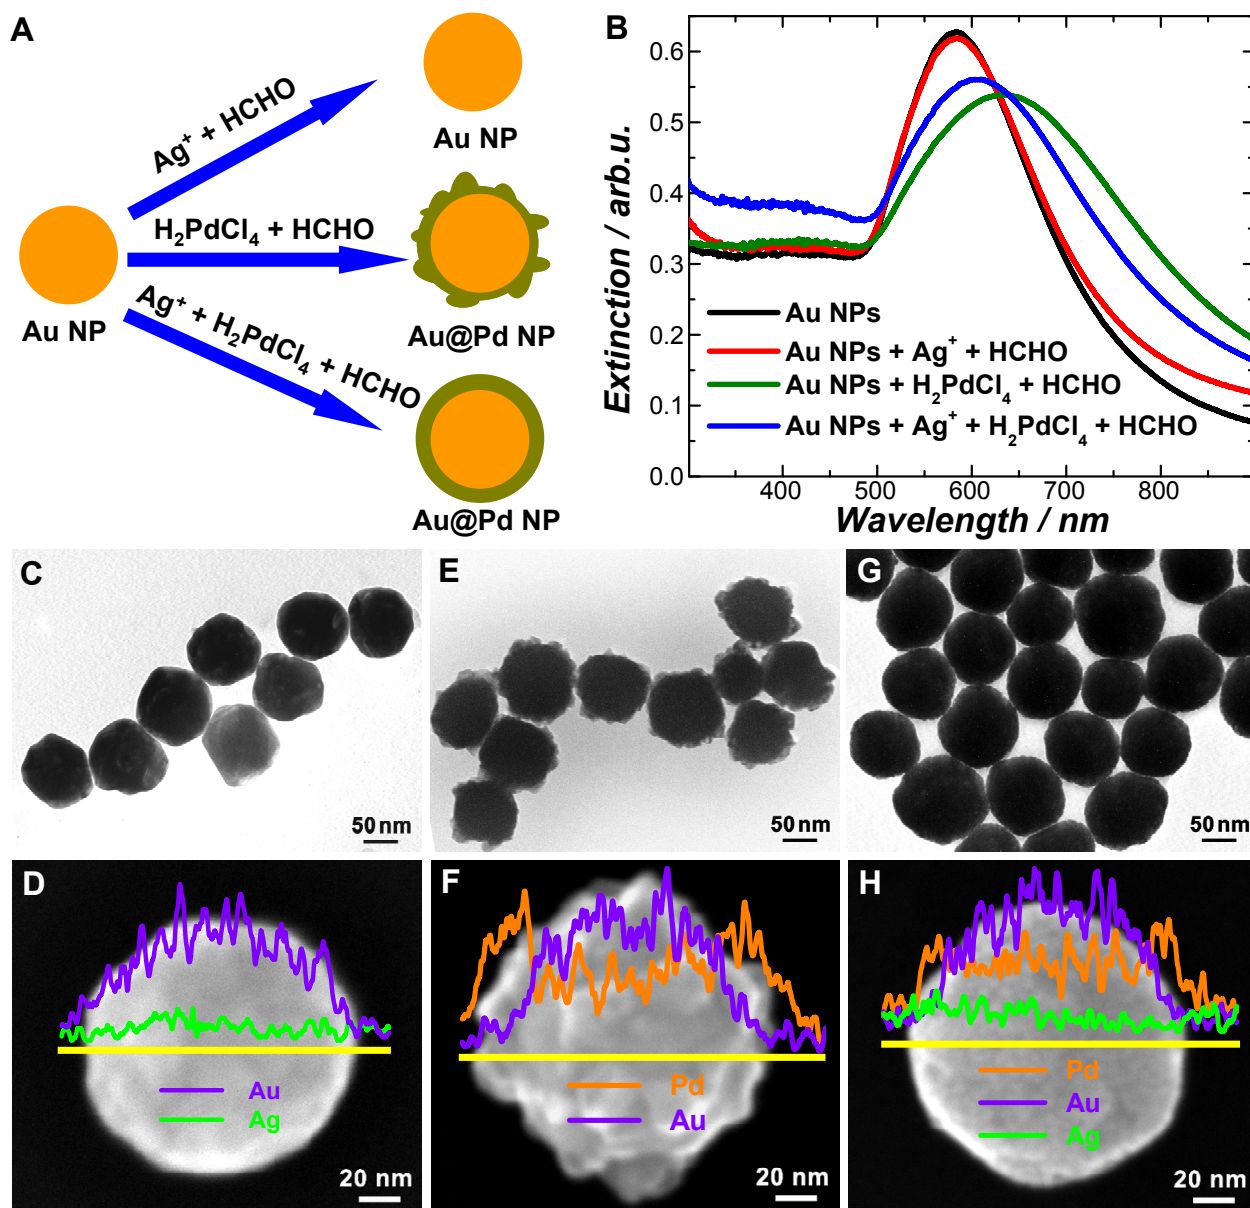

**Figure S11.** (A) Schematic illustration of Au nanoparticle-seeded electroless plating of Ag and Pd in the presence of HCHO. (B) Extinction spectra of Au nanoparticles and the nanoparticles synthesized by the Au-seeded reduction of  $\text{Ag}^+$ ,  $\text{H}_2\text{PdCl}_4$ , and  $\text{Ag}^+/\text{H}_2\text{PdCl}_4$  with HCHO. (C) TEM image and (D) SEM image with EDS results of nanoparticles synthesized by Au-seeded reduction of  $\text{Ag}^+$  with HCHO. (E) TEM image and (F) SEM image with EDS results of the nanoparticles synthesized by Au-seeded reduction of  $\text{H}_2\text{PdCl}_4$  with HCHO. (G) TEM image and (H) SEM image with EDS results of nanoparticles synthesized by the Au-seeded reduction of co-existing  $\text{Ag}^+$  and  $\text{H}_2\text{PdCl}_4$  with HCHO.

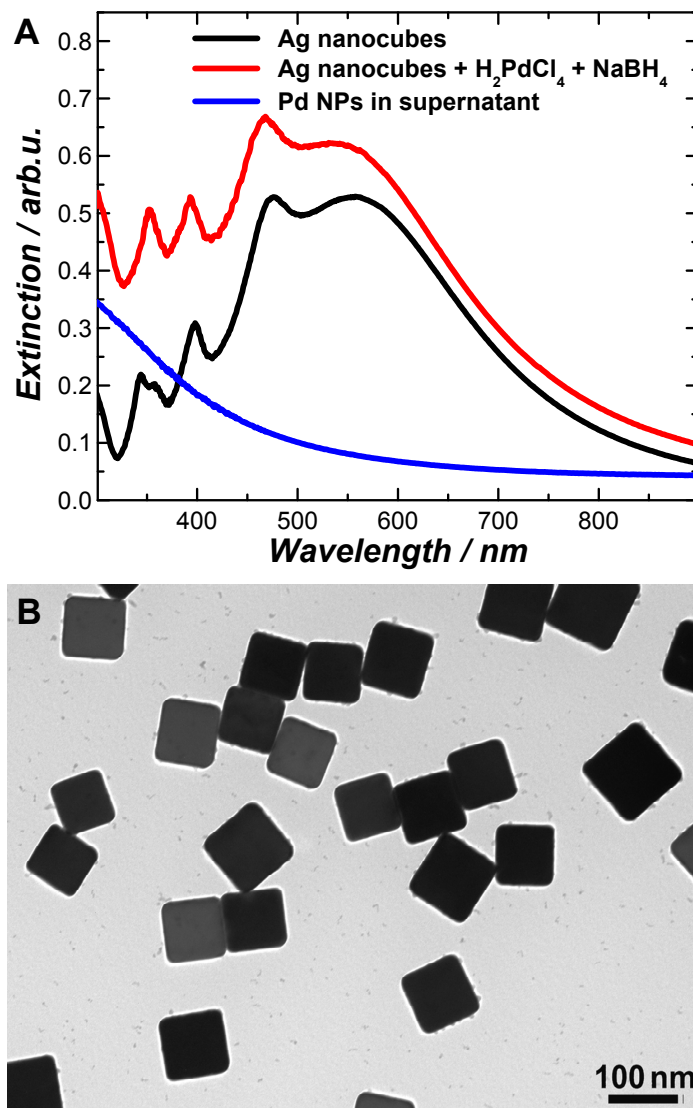

**Figure S12.** (A) Extinction spectra of Ag nanocubes, the colloidal sample obtained upon reacting 30  $\mu\text{L}$  of Ag nanocubes ( $5 \times 10^{10}$  particle  $\text{mL}^{-1}$ ) with 100  $\mu\text{L}$  of 1 mM  $\text{H}_2\text{PdCl}_4$  and 50  $\mu\text{L}$  of 50 mM  $\text{NaBH}_4$ , and the Pd nanoparticles remaining in the supernatant after the Ag nanocubes were centrifuged. (B) TEM image of a mixture of Ag nanocubes and Pd nanoparticles (2-3 nm in size) obtained upon reacting 30  $\mu\text{L}$  of Ag nanocubes ( $5 \times 10^{10}$  particle  $\text{mL}^{-1}$ ) with 100  $\mu\text{L}$  of 1 mM  $\text{H}_2\text{PdCl}_4$  and 50  $\mu\text{L}$  of 50 mM  $\text{NaBH}_4$ .

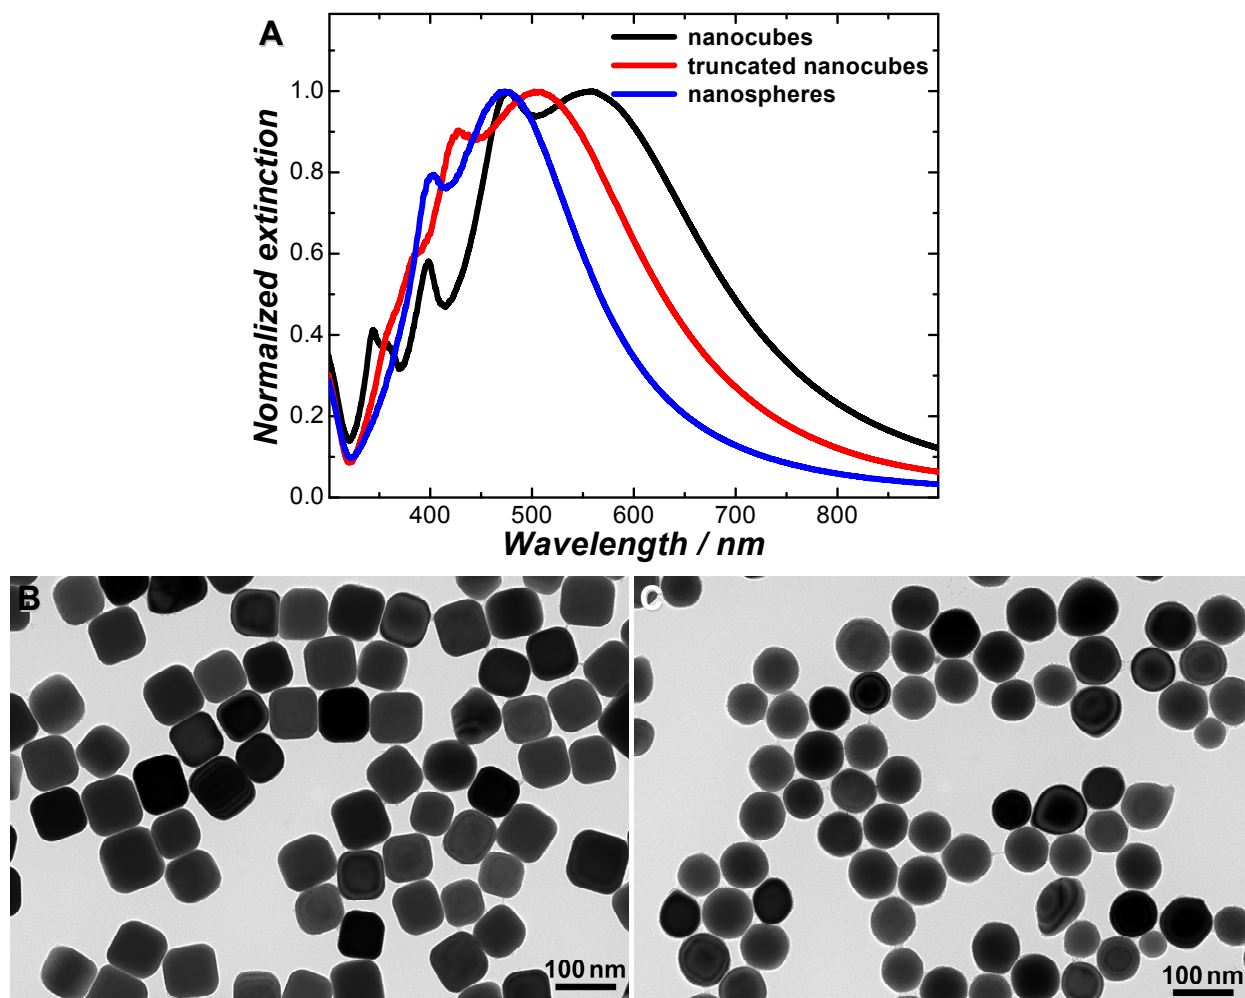

**Figure S13.** (A) Extinction spectra of Ag nanocubes, truncated Ag nanocubes, and Ag quasi-spherical nanoparticles obtained through  $\text{Fe}(\text{NO}_3)_3$  etching. The truncated Ag nanocubes were obtained by etching Ag nanocubes with 20  $\mu\text{L}$  of 50 mM  $\text{Fe}(\text{NO}_3)_3$  solution for 20 min at room temperature. The Ag quasi-spherical nanoparticles were obtained by etching Ag nanocubes with 5  $\mu\text{L}$  of 500 mM  $\text{Fe}(\text{NO}_3)_3$  solution for 2 hrs at room temperature. TEM images of (B) truncated Ag nanocubes and (C) Ag quasi-spherical nanoparticles.



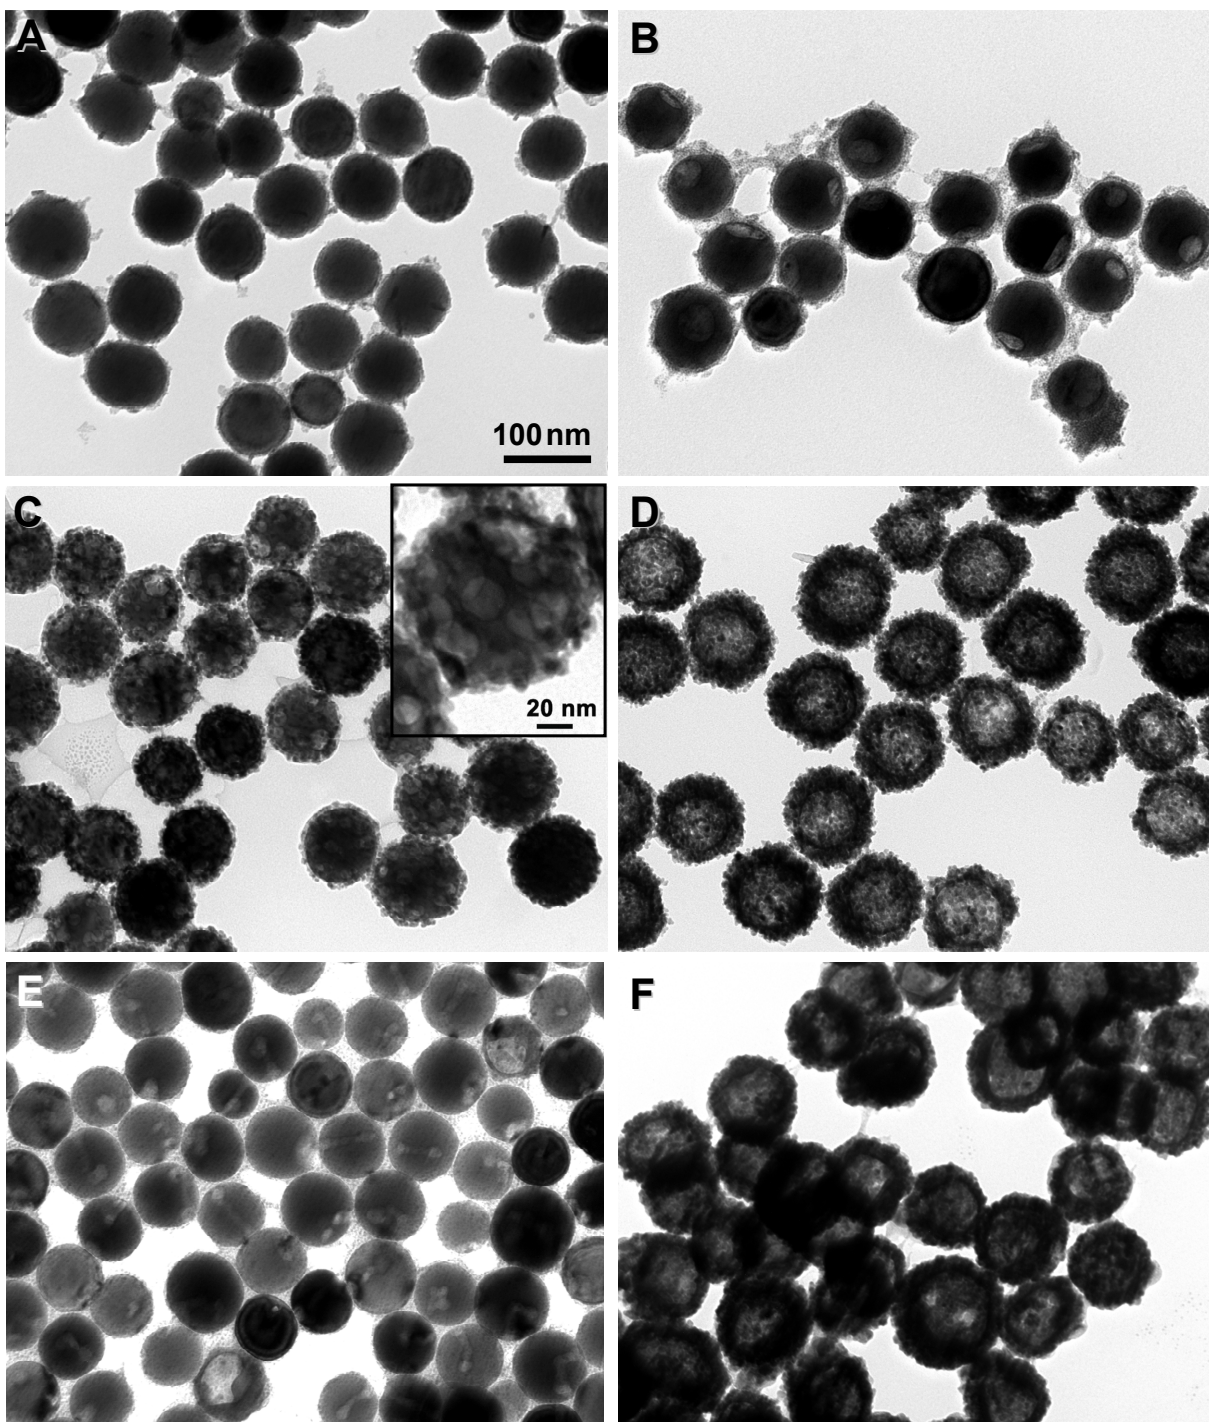

**Figure S14.** TEM images of Ag-Pd bimetallic hollow nanostructures obtained through galvanic replacement between Ag quasi-spherical nanoparticles and  $\text{H}_2\text{PdCl}_4$  under various conditions: (A) 15  $\mu\text{L}$  of 1 mM  $\text{H}_2\text{PdCl}_4$ , without reducing agent; (B) 60  $\mu\text{L}$  of 1 mM  $\text{H}_2\text{PdCl}_4$ , without reducing agent; (C) 15  $\mu\text{L}$  of 1 mM  $\text{H}_2\text{PdCl}_4$ , with AA; (D) 60  $\mu\text{L}$  of 1 mM  $\text{H}_2\text{PdCl}_4$ , with AA; (E) 15  $\mu\text{L}$  of 1 mM  $\text{H}_2\text{PdCl}_4$ , with HCHO; (F) 60  $\mu\text{L}$  of 1 mM  $\text{H}_2\text{PdCl}_4$ , with HCHO. The inset in panel C shows the TEM image of one multi-chambered Ag-Pd bimetallic nanoshell. All TEM images share the same scale bar in panel A.



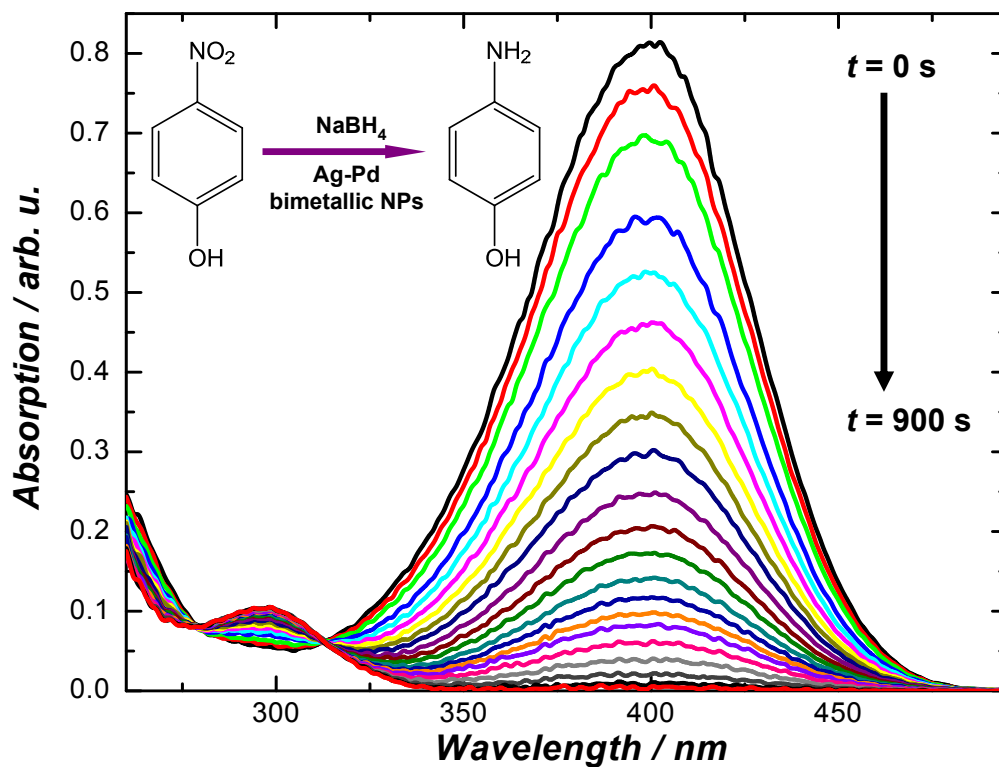

**Figure S15.** Time-resolved UV-vis absorption spectra of the reaction mixture during the Ag-Pd bimetallic nanoparticle-catalyzed hydrogenation of p-nitrophenol. The time interval between two consecutive spectra was 25 s. The Ag-Pd bimetallic nanoparticles were synthesized by galvanic replacement of Ag nanocubes with 100  $\mu\text{L}$  of 1 mM  $\text{H}_2\text{PdCl}_4$  in the presence of AA. The extinctions of the nanoparticles were subtracted from the overall extinctions.
